# Supplementary material
Source: Springer Nature journal article supplement (https://www.springermedizin.de/resource/supplementary/13054_2010_8821_MOESM3_ESM.pdf/9732652)

**(a)**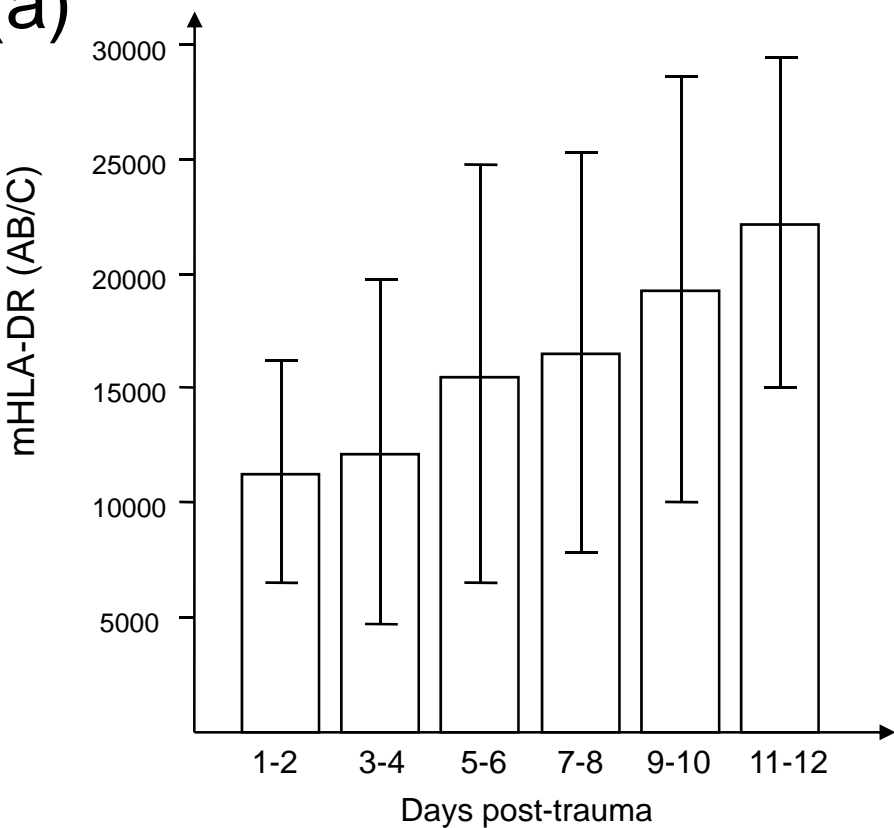**(b)**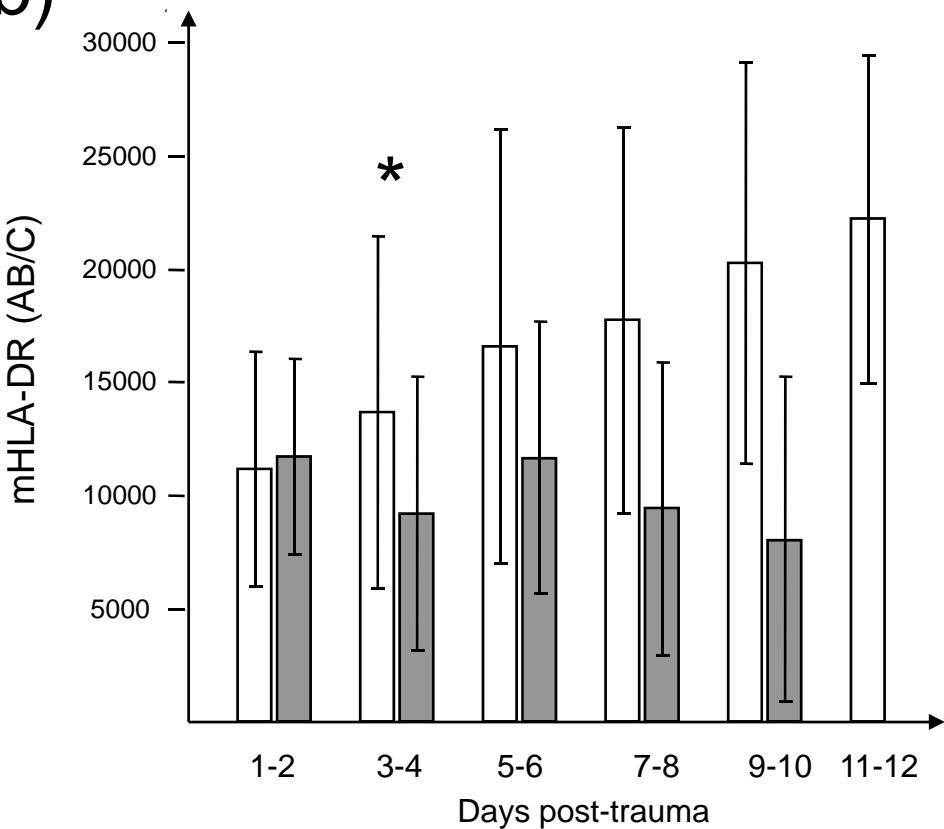

Supplement: MOESM3 [file 9732652]
